# Supplementary material for: Diabetes and obesity and risk of pyogenic liver abscess
Source: PubMed Central journal article supplement (PMC10188555; doi:10.1038/s41598-023-34889-z), 2023-05-16
Supplement: 41598_2023_34889_MOESM1_ESM.pdf [file 41598_2023_34889_MOESM1_ESM.pdf]

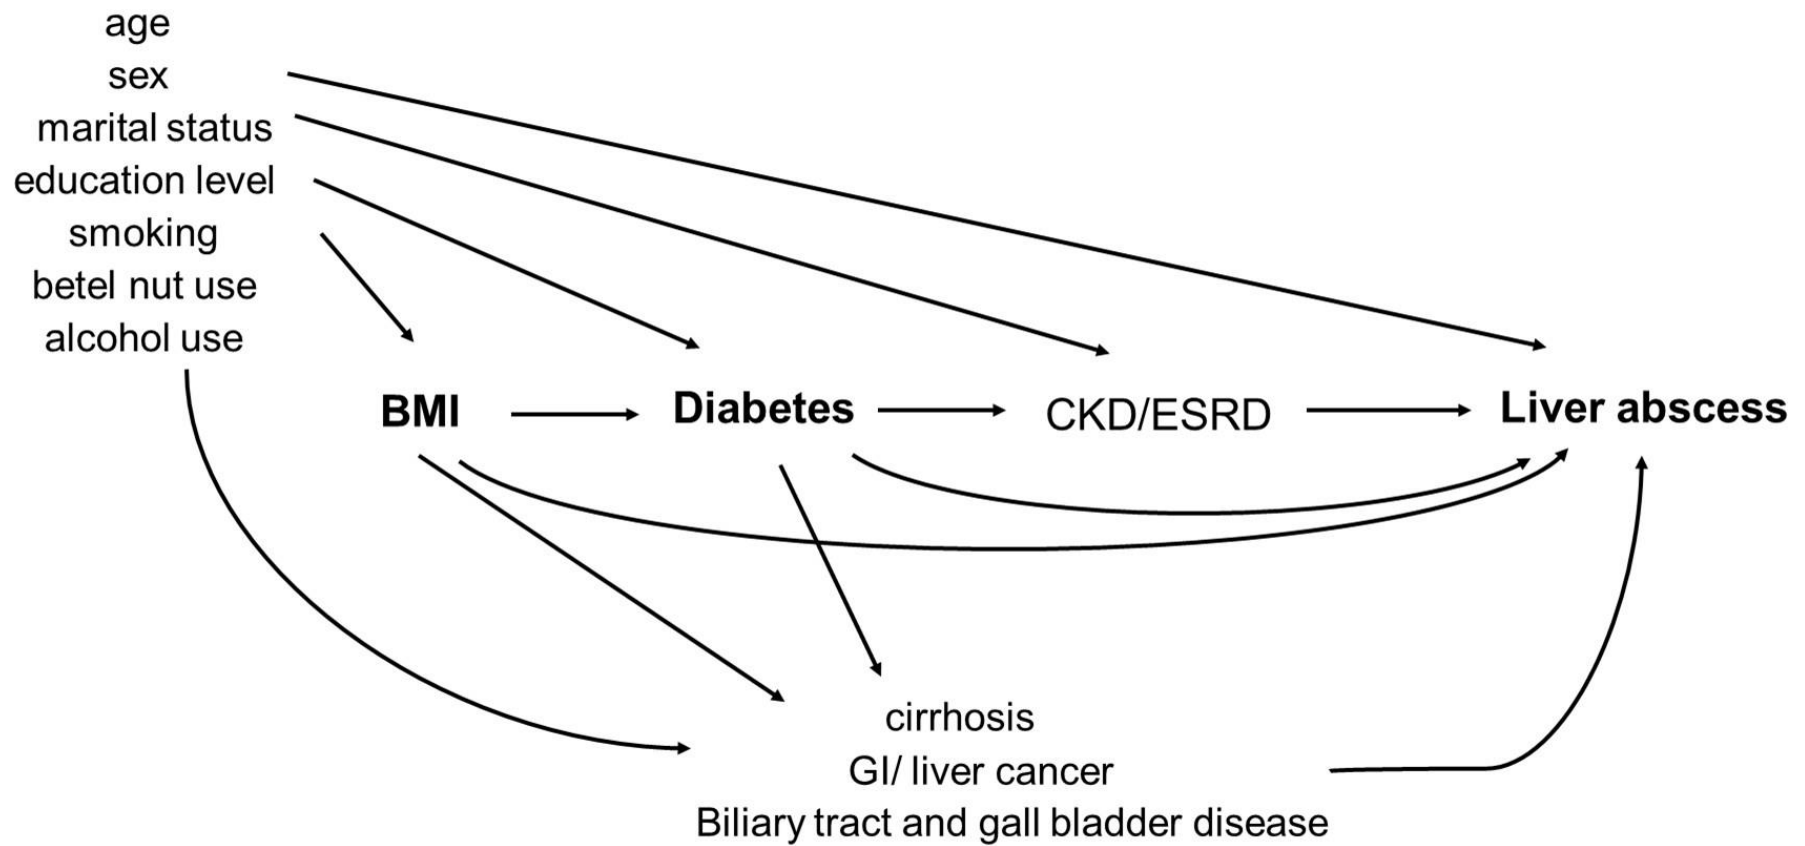

**Appendix figure:** Causal diagrams corresponding to the assumed relationships among variables considered in the study.
